# Supplementary material for: sSocial Determinants of Health and Cumulative Incidence of Mortality among U.S. Adults without Major Chronic Diseases
Source: bioRxiv or medRxiv preprint supplement (doi:10.1101/2024.03.16.24304395), 2024-03-18
Supplement: Supplementary file [file media-1.pdf]

| <b>Table S1. Exclusion criteria and variable definitions</b> |                                                                                                                                                 |
|--------------------------------------------------------------|-------------------------------------------------------------------------------------------------------------------------------------------------|
| <b>Variable</b>                                              | <b>Definition</b>                                                                                                                               |
| Hypertension                                                 | Systolic blood pressure $\geq 130$ mmHg OR diastolic blood pressure $\geq 80$ mmHg OR current use of an antihypertensive medication             |
| Diabetes                                                     | Hemoglobin A1c (HbA1c) $\geq 6.5\%$ (44.0 mmol/mol) OR current use of insulin OR current use of an anti-hyperglycemic medication                |
| Class III Obesity                                            | Body mass index (BMI) $\geq 40$ kg/m <sup>2</sup>                                                                                               |
| Hyperlipidemia                                               | Total cholesterol $\geq 240$ mg/dL (6.5 mmol/L) OR current use of a lipid-lowering medication                                                   |
| Chronic kidney disease                                       | Estimated glomerular filtration rate $< 60$ ml/min per 1.73m <sup>2</sup> or urinary albumin-to-creatinine ratio $\geq 30$ mg/g (3 mmol/mol)    |
| History of cardiovascular disease                            | Ever been told by a medical professional that you have had coronary heart disease, angina pectoris, heart failure, a stroke, or a heart attack. |
| History of cancer                                            | Ever been told by a medical professional that you have had a cancer or malignancy of any kind.                                                  |
| History of respiratory disease                               | Ever been told by a medical profession that you have chronic bronchitis, emphysema, asthma, or chronic obstructive pulmonary disease.           |
| History of liver disease                                     | Ever been told by a medical professional that you have had any kind of liver condition.                                                         |
| History of arthritis                                         | Ever been told by a medical professional that you have arthritis.                                                                               |
| History of dialysis use                                      | Underwent dialysis in the last 12 months.                                                                                                       |
| Hepatitis B                                                  | Positive hepatitis B core antibody with duplicate testing.                                                                                      |
| Hepatitis C                                                  | Positive hepatitis C core antibody with duplicate testing.                                                                                      |
| Human immunodeficiency virus (HIV)                           | Positive HIV-1 or HIV-2 antibody with duplicate testing and/or confirmatory testing.                                                            |
| Pregnancy                                                    | Positive urine pregnancy test.                                                                                                                  |

| <b>Table S2. Variable Definitions for Social Determinants of Health</b>                                                                                                                                                                                                                                                                                                         |                                |                                                                                                                                                                                                                            |                                                                                                                                                                                           |
|---------------------------------------------------------------------------------------------------------------------------------------------------------------------------------------------------------------------------------------------------------------------------------------------------------------------------------------------------------------------------------|--------------------------------|----------------------------------------------------------------------------------------------------------------------------------------------------------------------------------------------------------------------------|-------------------------------------------------------------------------------------------------------------------------------------------------------------------------------------------|
| <b>Variable</b>                                                                                                                                                                                                                                                                                                                                                                 | <b>Domain<sup>†</sup></b>      | <b>NHANES Question<sup>‡</sup> / Variable Definition</b>                                                                                                                                                                   | <b>Variable Levels</b>                                                                                                                                                                    |
| Poverty to Income Ratio                                                                                                                                                                                                                                                                                                                                                         | Economic Stability             | Total family income was reported by participants as a range of values (in dollars). NHANES then calculated a family poverty-to-income ratio.                                                                               | <100%, 100-300%, and ≥300% of the federal poverty level.                                                                                                                                  |
| Educational Attainment                                                                                                                                                                                                                                                                                                                                                          | Education Access and Quality   | What is the highest grade or level of school you have completed, or the highest degree you have received?                                                                                                                  | Below high school, high school or general education diploma, and above high school.                                                                                                       |
| Food Insecurity                                                                                                                                                                                                                                                                                                                                                                 | Economic Stability             | Participants completed an 18-item U.S. Household Food Security Survey Module.                                                                                                                                              | Food secure (zero affirmative responses) and food insecure (≥1 positive response).                                                                                                        |
| Employment                                                                                                                                                                                                                                                                                                                                                                      | Economic Stability             | What kind of work did you do in the last week?                                                                                                                                                                             | Employed (currently working, student, or retired) and unemployed (not currently working).                                                                                                 |
| Health Insurance                                                                                                                                                                                                                                                                                                                                                                | Health Care Access and Quality | Are you covered by health insurance or some other kind of health care plan?                                                                                                                                                | Insured and uninsured.                                                                                                                                                                    |
| Routine source of care                                                                                                                                                                                                                                                                                                                                                          | Health Care Access and Quality | Is there a place that you usually go when you are sick or need advice about your health? What kind of place do you go most often?                                                                                          | Routine source of care (there is at least one source of care that is not the emergency room) and lack of a routine source of care (no source of care or only rely on the emergency room). |
| Acculturation                                                                                                                                                                                                                                                                                                                                                                   | Social and Community Context   | What country were you born in? If you were not born in the U.S., how long have you been in the U.S.                                                                                                                        | U.S. born, non-U.S. born and lived in the U.S. for ≥10 years, and non-U.S. born and lived in the U.S. <10 years.                                                                          |
| Cumulative SDOH score                                                                                                                                                                                                                                                                                                                                                           | All of the above               | One point value was assigned to each adverse social determinant: PIR <100%, below high school education, food insecurity, unemployment, lack of health insurance, lack of a routine source of healthcare, born in the U.S. | A cumulative score was obtained by summing the number of points (range 0-7).                                                                                                              |
| <sup>†</sup> As defined by Healthy People 2030. Available at <a href="https://health.gov/healthypeople/priority-areas/social-determinants-health">https://health.gov/healthypeople/priority-areas/social-determinants-health</a><br><sup>‡</sup> Details available at <a href="https://wwwn.cdc.gov/nchs/nhanes/default.aspx">https://wwwn.cdc.gov/nchs/nhanes/default.aspx</a> |                                |                                                                                                                                                                                                                            |                                                                                                                                                                                           |

| <b>Table S3. Missingness prior to imputation</b> |              |
|--------------------------------------------------|--------------|
|                                                  | <b>N (%)</b> |
| Smoking status                                   | 12 (0.1)     |
| Hemoglobin A1c                                   | 19 (0.2)     |
| Body mass index                                  | 105 (1.0)    |
| Systolic blood pressure                          | 541 (4.9)    |
| Total cholesterol                                | 876 (8.0)    |
| Serum creatinine                                 | 900 (8.2)    |

**Table S4. Participant Characteristics Prior to Imputation (N=10,320).**

|                                    | Overall      | Non-Hispanic White | Non-Hispanic Black | Hispanic†    | Other        |
|------------------------------------|--------------|--------------------|--------------------|--------------|--------------|
| N                                  | 10,320       | 4,116              | 1,698              | 3,433        | 1,073        |
| Age                                | 35.0 (11.2)  | 36.2 (11.6)        | 32.2 (10.0)        | 32.9 (9.9)   | 33.6 (9.8)   |
| Female sex                         | 52.0         | 51.9               | 52.6               | 50.1         | 56.1         |
| Race or ethnicity                  |              |                    |                    |              |              |
| Non-Hispanic White                 | 64.5         | 100                | 0                  | 0            | 0            |
| Mexican American                   | 12.2         | 0                  | 0                  | 62.6         | 0            |
| Other Hispanic                     | 7.3          | 0                  | 0                  | 37.4         | 0            |
| Non-Hispanic Black                 | 9.1          | 0                  | 100                | 0            | 0            |
| Other Race                         | 6.9          | 0                  | 0                  | 0            | 100          |
| Education                          |              |                    |                    |              |              |
| Below High School                  | 15.0         | 7.7                | 17.8               | 39.5         | 9.3          |
| High School/GED                    | 21.8         | 21.9               | 26.0               | 22.0         | 14.8         |
| Above High School                  | 63.3         | 70.4               | 56.2               | 38.5         | 75.9         |
| Poverty-to-Income Ratio            |              |                    |                    |              |              |
| <100% FPL                          | 14.2         | 8.5                | 24.3               | 29.1         | 15.1         |
| 100-300% FPL                       | 35.7         | 31.8               | 44.3               | 44.3         | 30.3         |
| ≥300 FPL                           | 50.1         | 59.7               | 31.3               | 23.6         | 54.5         |
| Food insecurity                    | 22.3         | 14.4               | 36.7               | 43.5         | 18.0         |
| Uninsured                          | 25.0         | 17.3               | 32.5               | 49.1         | 19.3         |
| Lack of employment                 | 19.2         | 17.6               | 21.8               | 22.7         | 20.9         |
| Lack a regular source of care      | 26.1         | 21.2               | 28.2               | 40.5         | 28.7         |
| Acculturation                      |              |                    |                    |              |              |
| US Born                            | 82.0         | 94.8               | 89.0               | 43.8         | 39.1         |
| US Born, Lived in US ≥10 years     | 10.7         | 2.9                | 6.6                | 35.6         | 31.9         |
| Non-US Born, Lived in US <10 years | 7.4          | 2.4                | 4.5                | 20.6         | 29.0         |
| Cumulative SDOH score              | 2.5 (1.1)    | 2.4 (1.0)          | 2.9 (1.3)          | 2.7 (1.3)    | 1.9 (1.2)    |
| Smoking status                     |              |                    |                    |              |              |
| Never                              | 61.2         | 57.1               | 68.0               | 67.8         | 72.0         |
| Former                             | 16.5         | 18.6               | 6.9                | 14.9         | 13.0         |
| Current                            | 22.3         | 24.3               | 25.1               | 17.2         | 15.0         |
| Heavy alcohol use                  | 15.3         | 14.9               | 9.9                | 21.8         | 7.7          |
| Intravenous drug use               | 6.8          | 8.2                | 3.4                | 5.1          | 2.8          |
| Body Mass Index, kg/m <sup>2</sup> | 26.2 (4.8)   | 25.9 (4.7)         | 27.2 (5.3)         | 27.2 (4.6)   | 24.8 (4.6)   |
| Hemoglobin A1c, %                  | 5.2 (0.3)    | 5.2 (0.3)          | 5.3 (0.4)          | 5.3 (0.3)    | 5.3 (0.3)    |
| Total Cholesterol, mg/dL           | 181.8 (29.5) | 182.8 (29.4)       | 176.3 (30.5)       | 181.5 (29.5) | 180.4 (28.8) |

|                                     |              |              |              |              |              |
|-------------------------------------|--------------|--------------|--------------|--------------|--------------|
| Systolic Blood Pressure, mmHg       | 111.5 (8.8)  | 111.6 (9.1)  | 112.9 (8.6)  | 111.3 (8.8)  | 109.9 (9.2)  |
| eGFR, ml/min per 1.73m <sup>2</sup> | 106.6 (15.9) | 104.1 (15.6) | 102.3 (16.8) | 114.7 (13.8) | 111.6 (13.8) |

† Hispanic includes both Mexican American and Other Hispanic.

Abbreviations: eGFR, estimated glomerular filtration rate; FPL, federal poverty level; GED, general education diploma.

|                                    | <b>Overall</b> | <b>Non-Hispanic White</b> | <b>Non-Hispanic Black</b> | <b>Hispanic†</b> | <b>Other</b> |
|------------------------------------|----------------|---------------------------|---------------------------|------------------|--------------|
| N                                  | 11,413         | 4,464                     | 1,967                     | 3,752            | 1,230        |
| Age                                | 34.9 (11.2)    | 36.1 (11.7)               | 32.4 (10.1)               | 32.9 (9.8)       | 33.8 (10.0)  |
| Female sex                         | 51.9           | 52.0                      | 51.9                      | 50.0             | 55.9         |
| Race or ethnicity                  |                |                           |                           |                  |              |
| Non-Hispanic White                 | 63.7           | 100                       | 0                         | 0                | 0            |
| Mexican American                   | 12.2           | 0                         | 0                         | 62.6             | 0            |
| Other Hispanic                     | 7.3            | 0                         | 0                         | 37.4             | 0            |
| Non-Hispanic Black                 | 9.6            | 0                         | 100                       | 0                | 0            |
| Other Race                         | 7.2            | 0                         | 0                         | 0                | 100          |
| Education                          |                |                           |                           |                  |              |
| Below High School                  | 15.4           | 7.9                       | 18.0                      | 40.8             | 9.9          |
| High School/GED                    | 21.9           | 22.1                      | 26.4                      | 21.7             | 14.3         |
| Above High School                  | 62.7           | 70.0                      | 55.6                      | 37.5             | 75.9         |
| Poverty-to-Income Ratio            |                |                           |                           |                  |              |
| <100% FPL                          | 14.8           | 9.0                       | 24.6                      | 29.7             | 15.9         |
| 100-300% FPL                       | 35.7           | 31.8                      | 43.8                      | 47.2             | 31.2         |
| ≥300 FPL                           | 49.5           | 59.3                      | 31.6                      | 23.1             | 52.9         |
| Food insecurity                    | 22.4           | 14.5                      | 36.0                      | 43.6             | 18.1         |
| Uninsured                          | 25.3           | 17.5                      | 32.2                      | 49.9             | 19.1         |
| Lack of employment                 | 19.6           | 18.0                      | 22.8                      | 22.6             | 21.5         |
| Lack a regular source of care      | 26.4           | 21.5                      | 28.2                      | 41.0             | 28.4         |
| Acculturation                      |                |                           |                           |                  |              |
| US Born                            | 81.4           | 94.7                      | 88.2                      | 43.3             | 37.6         |
| US Born, Lived in US ≥10 years     | 10.9           | 3.0                       | 6.8                       | 35.9             | 32.7         |
| Non-US Born, Lived in US <10 years | 7.7            | 2.4                       | 5.0                       | 20.8             | 29.7         |
| Cumulative SDOH score              | 2.5 (1.1)      | 2.4 (1.0)                 | 2.9 (1.3)                 | 2.8 (1.3)        | 1.9 (1.2)    |
| Smoking status                     |                |                           |                           |                  |              |
| Never                              | 61.6           | 57.4                      | 68.5                      | 68.0             | 72.2         |
| Former                             | 16.0           | 18.1                      | 6.6                       | 14.7             | 12.8         |
| Current                            | 22.4           | 24.5                      | 24.9                      | 17.3             | 15.0         |
| Heavy alcohol use                  | 20.9           | 20.0                      | 17.3                      | 27.7             | 16.4         |
| Intravenous drug use               | 6.5            | 8.0                       | 3.1                       | 5.0              | 2.5          |
| Body Mass Index, kg/m <sup>2</sup> | 26.2 (4.8)     | 25.9 (4.8)                | 27.2 (5.3)                | 27.2 (4.6)       | 24.8 (4.6)   |
| Hemoglobin A1c, %                  | 5.2 (0.3)      | 5.2 (0.3)                 | 5.3 (0.4)                 | 5.3 (0.3)        | 5.3 (0.3)    |
| Total Cholesterol, mg/dL           | 181.8 (29.6)   | 182.8 (29.4)              | 177.0 (30.4)              | 181.6 (29.7)     | 180.7 (29.0) |

|                                     |              |              |              |              |              |
|-------------------------------------|--------------|--------------|--------------|--------------|--------------|
| Systolic Blood Pressure, mmHg       | 111.6 (9.1)  | 111.7 (9.1)  | 113.0 (8.8)  | 111.3 (8.8)  | 110.3 (9.2)  |
| eGFR, ml/min per 1.73m <sup>2</sup> | 106.4 (16.2) | 104.1 (15.8) | 102.5 (17.0) | 114.4 (14.2) | 110.8 (14.8) |

† Hispanic includes both Mexican American and Other Hispanic.

Abbreviations: eGFR, estimated glomerular filtration rate; FPL, federal poverty level; GED, general education diploma; SDOH, social determinants of health.

| <b>Table S6. Trends in Age-Adjusted* Prevalence of Social Determinants of Health, 1999-2018.</b> |                   |                   |                   |                   |                   |                |
|--------------------------------------------------------------------------------------------------|-------------------|-------------------|-------------------|-------------------|-------------------|----------------|
|                                                                                                  | <b>Overall</b>    | <b>1999-2002</b>  | <b>2003-2008</b>  | <b>2009-2014</b>  | <b>2015-2018</b>  | <b>p-trend</b> |
| Poverty-to-Income Ratio                                                                          |                   |                   |                   |                   |                   |                |
| <100% FPL                                                                                        | 11.8 (10.8, 12.8) | 10.6 (8.6, 12.6)  | 11.3 (9.4, 13.2)  | 14.1 (12.3, 15.9) | 10.3 (8.2, 12.3)  | 0.10           |
| 100-300% FPL                                                                                     | 33.2 (31.1, 35.3) | 34.4 (29.4, 39.4) | 38.1 (34.9, 41.2) | 30.6 (26.4, 34.8) | 32.5 (28.4, 36.6) | 0.91           |
| ≥300% FPL                                                                                        | 55.1 (52.7, 57.4) | 55.0 (49.4, 60.5) | 50.6 (47.1, 54.1) | 55.3 (50.6, 60.0) | 57.2 (52.5, 61.9) | 0.46           |
| Educational Attainment                                                                           |                   |                   |                   |                   |                   |                |
| Below high school                                                                                | 15.5 (14.1, 17.0) | 19.8 (16.1, 23.5) | 16.4 (13.8, 19.0) | 15.4 (12.8, 18.0) | 12.1 (9.1, 15.2)  | <0.001         |
| High school/GED                                                                                  | 19.9 (18.1, 21.6) | 20.3 (15.5, 25.1) | 22.4 (19.7, 25.1) | 17.4 (14.8, 20.0) | 20.3 (15.5, 25.1) | 0.50           |
| Above high school                                                                                | 64.5 (62.2, 66.8) | 60.0 (55.2, 64.7) | 61.1 (57.9, 64.3) | 67.2 (63.7, 70.7) | 67.5 (61.1, 74.0) | 0.02           |
| Food Insecure                                                                                    | 17.5 (16.2, 18.9) | 11.5 (9.6, 13.4)  | 15.5 (13.4, 17.6) | 19.1 (17.2, 21.2) | 23.1 (18.9, 27.3) | <0.001         |
| Unemployed                                                                                       | 18.9 (17.3, 20.5) | 18.7 (15.9, 21.5) | 17.0 (14.8, 19.3) | 19.4 (17.0, 21.8) | 19.7 (15.5, 23.9) | 0.53           |
| Uninsured                                                                                        | 20.5 (19.0, 21.9) | 19.3 (16.0, 22.6) | 23.3 (20.3, 26.3) | 22.9 (20.2, 25.7) | 15.1 (12.3, 18.0) | 0.02           |
| No usual source of care                                                                          | 21.2 (19.9, 22.5) | 21.1 (18.4, 23.8) | 22.5 (19.6, 25.3) | 19.0 (17.0, 21.1) | 23.1 (20.4, 25.8) | 0.67           |
| * Age-standardized to the 2010 U.S. Census                                                       |                   |                   |                   |                   |                   |                |
| Abbreviations: FPL, federal poverty level; GED, general education diploma.                       |                   |                   |                   |                   |                   |                |



| <b>Table S7. Adjusted cumulative incidence of mortality and absolute risk difference by social determinant of health</b> |                                                       |                                                       |                                         |                                         |
|--------------------------------------------------------------------------------------------------------------------------|-------------------------------------------------------|-------------------------------------------------------|-----------------------------------------|-----------------------------------------|
|                                                                                                                          | <b>10-year adjusted cumulative incidence (95% CI)</b> | <b>15-year adjusted cumulative incidence (95% CI)</b> | <b>10-year risk difference (95% CI)</b> | <b>15-year risk difference (95% CI)</b> |
| <b>Poverty-to-Income Ratio (PIR)</b>                                                                                     |                                                       |                                                       |                                         |                                         |
| <100% FPL                                                                                                                | 3.2% (1.5-4.9)                                        | 5.6% (2.8-8.5)                                        |                                         |                                         |
| 100-300% FPL                                                                                                             | 2.0% (1.2-2.7)                                        | 3.5% (2.1-4.9)                                        | 0.6% (-0.03-1.6) <sup>a</sup>           | 1.1% (-0.7-3.0) <sup>a</sup>            |
| ≥300% FPL                                                                                                                | 1.3% (0.7-2.0)                                        | 2.4% (1.1-3.7)                                        | 1.9% (0.06-3.7) <sup>b</sup>            | 3.2% (0.08-6.3) <sup>b</sup>            |
| <b>Educational Attainment</b>                                                                                            |                                                       |                                                       |                                         |                                         |
| Below high school                                                                                                        | 3.0% (1.9-4.2)                                        | 5.2% (3.2-7.3)                                        |                                         |                                         |
| High school/GED                                                                                                          | 2.1% (0.9-3.3)                                        | 3.7% (1.6-5.8)                                        | 0.9% (-0.7-2.5) <sup>c</sup>            | 1.5% (-1.3-4.4) <sup>c</sup>            |
| Above high school                                                                                                        | 1.4% (1.0-1.9)                                        | 2.5% (1.6-3.4)                                        | 1.6% (0.4-2.8) <sup>d</sup>             | 2.7% (0.4-4.9) <sup>d</sup>             |
| <b>Employment Status</b>                                                                                                 |                                                       |                                                       |                                         |                                         |
| Unemployed                                                                                                               | 2.4% (1.5-3.3)                                        | 4.1% (2.7-5.5)                                        | 0.4% (-0.4-1.4)                         | 0.8% (-0.8-2.5)                         |
| Employed                                                                                                                 | 1.9% (1.4-2.3)                                        | 3.3% (2.3-4.2)                                        |                                         |                                         |
| <b>Food Security</b>                                                                                                     |                                                       |                                                       |                                         |                                         |
| Food insecure                                                                                                            | 2.9% (1.7-4.1)                                        | 4.9% (2.7-7.2)                                        | 1.2% (-0.06-2.4)                        | 2.0% (-0.04-4.4)                        |
| Food secure                                                                                                              | 1.7% (1.3-2.1)                                        | 2.9% (2.2-3.7)                                        |                                         |                                         |
| <b>Health Insurance</b>                                                                                                  |                                                       |                                                       |                                         |                                         |
| Uninsured                                                                                                                | 2.4% (1.4-3.5)                                        | 4.2% (2.2-6.2)                                        | 0.6% (-0.5-1.7)                         | 1.0% (-1.0-3.2)                         |
| Insured                                                                                                                  | 1.8% (1.4-2.2)                                        | 3.1% (2.3-4.0)                                        |                                         |                                         |
| <b>Access to Care</b>                                                                                                    |                                                       |                                                       |                                         |                                         |
| Lack of a routine source of healthcare                                                                                   | 2.4% (1.2-3.5)                                        | 4.1% (2.1-6.0)                                        | 0.5% (-0.7-1.7)                         | 0.8% (-1.3-3.0)                         |
| Routine source of healthcare                                                                                             | 1.9% (1.4-2.3)                                        | 3.2% (2.3-4.2)                                        |                                         |                                         |
| <b>Nativity and Acculturation</b>                                                                                        |                                                       |                                                       |                                         |                                         |
| U.S. Born                                                                                                                | 2.3% (1.7-3.0)                                        | 4.0% (2.8-5.2)                                        |                                         |                                         |
| Non-U.S. Born, Lived in U.S. ≥ 10 years                                                                                  | 1.8% (0.8-2.8)                                        | 3.1% (1.5-4.7)                                        | 0.5% (-0.6-1.7) <sup>e</sup>            | 0.9% (-1.1-2.9) <sup>e</sup>            |
| Non-U.S. Born, Lived in U.S. < 10 years                                                                                  | 0.7% (0.0-1.4)                                        | 1.2% (0.0-2.5)                                        | 1.6% (0.6-2.6) <sup>f</sup>             | 2.8% (0.9-4.6) <sup>f</sup>             |
| <sup>a</sup> Risk difference represents: PIR <100% – PIR 100-300%                                                        |                                                       |                                                       |                                         |                                         |
| <sup>b</sup> Risk difference represents: PIR <100% – PIR >300%                                                           |                                                       |                                                       |                                         |                                         |
| <sup>c</sup> Risk difference represents: below high school – above high school                                           |                                                       |                                                       |                                         |                                         |
| <sup>d</sup> Risk difference represents: below high school – high school                                                 |                                                       |                                                       |                                         |                                         |
| <sup>e</sup> Risk difference represents: U.S. Born – Non-U.S. Born, Lived in the U.S. ≥ 10 years                         |                                                       |                                                       |                                         |                                         |
| <sup>f</sup> Risk difference represents: U.S. Born – Non-U.S. Born, Lived in the U.S. < 10 years                         |                                                       |                                                       |                                         |                                         |

Models adjusted for age, sex, race or ethnicity, smoking status, body mass index, hemoglobin A1c, total cholesterol, systolic blood pressure, eGFR, survey year, alcohol use, and injection drug use.

Abbreviations: CI, confidence interval; FPL, federal poverty level; GED, general education diploma; PIR, poverty to income ratio; U.S., United States.

| <b>Table S8. Associations between social determinants of health and mortality.</b> |            |                           |                             |                             |                             |
|------------------------------------------------------------------------------------|------------|---------------------------|-----------------------------|-----------------------------|-----------------------------|
|                                                                                    | <b>N †</b> | <b>Crude <sup>a</sup></b> | <b>Model 1 <sup>b</sup></b> | <b>Model 2 <sup>c</sup></b> | <b>Model 3 <sup>d</sup></b> |
|                                                                                    |            | <b>HR [95% CI]</b>        | <b>HR [95% CI]</b>          | <b>HR [95% CI]</b>          | <b>HR [95% CI]</b>          |
| Poverty-to-Income Ratio                                                            | 10,433     |                           |                             |                             |                             |
| <100% FPL                                                                          |            | 1.64 [1.02, 2.62]         | 3.12 [1.86, 5.24]           | 2.40 [1.38, 4.18]           | 2.48 [1.43, 4.32]           |
| 100-300% FPL                                                                       |            | 1.19 [0.82, 1.71]         | 1.72 [1.19, 2.49]           | 1.49 [1.04, 2.14]           | 1.52 [1.06, 2.19]           |
| ≥300% FPL                                                                          |            | Referent                  | Referent                    | Referent                    | Referent                    |
| Education                                                                          | 11,402     |                           |                             |                             |                             |
| Below high school                                                                  |            | 2.23 [1.60, 3.11]         | 2.72 [1.84, 4.01]           | 2.17 [1.49, 3.16]           | 2.22 [1.52, 3.21]           |
| High school/GED                                                                    |            | 1.54 [1.04, 2.30]         | 1.73 [1.18, 2.54]           | 1.52 [1.05, 2.21]           | 1.52 [1.03, 2.23]           |
| Above high school                                                                  |            | Referent                  | Referent                    | Referent                    | Referent                    |
| Lack of employment                                                                 | 11,407     | 1.07 [0.75, 1.52]         | 1.34 [0.94, 1.93]           | 1.28 [0.89, 1.83]           | 1.28 [0.90, 1.84]           |
| Food insecurity                                                                    | 11,138     | 1.32 [0.95, 1.83]         | 2.10 [1.47, 3.02]           | 1.73 [1.20, 2.49]           | 1.73 [1.20, 2.51]           |
| Nativity and Acculturation                                                         | 10,394     |                           |                             |                             |                             |
| U.S. Born                                                                          |            | 5.10 [2.24, 11.60]        | 3.75 [1.56, 9.06]           | 3.53 [1.46, 8.52]           | 3.44 [1.42, 8.34]           |
| U.S. Born, Lived in U.S. ≥10 years                                                 |            | 4.66 [1.82, 11.96]        | 2.70 [1.04, 6.99]           | 2.68 [1.04, 6.89]           | 2.67 [1.03, 6.88]           |
| Non-US Born, Lived in U.S. <10 years                                               |            | Referent                  | Referent                    | Referent                    | Referent                    |
| Lack of health insurance                                                           | 11,359     | 1.07 [0.77, 1.51]         | 1.67 [1.17, 2.37]           | 1.37 [0.94, 1.99]           | 1.36 [0.93, 1.98]           |
| Lack of regular source of care                                                     | 11,413     | 1.08 [0.74, 1.58]         | 1.47 [0.99, 2.18]           | 1.31 [0.88, 1.94]           | 1.29 [0.88, 1.91]           |
| Cumulative SDOH score                                                              | 11,413     | 1.25 [1.12, 1.41]         | 1.45 [1.27, 1.64]           | 1.32 [1.15, 1.52]           | 1.33 [1.16, 1.52]           |

† Sample size varies due to variable participant non-response to social determinants of health questions.

<sup>a</sup> Crude

<sup>b</sup> Model 1: adjusted for age, sex, race or ethnicity, and survey year.

<sup>c</sup> Model 2: adjusted for Model 1 + smoking status, body mass index, hemoglobin A1c, total cholesterol, systolic blood pressure, eGFR.

<sup>d</sup> Model 3: adjusted for Model 2 + alcohol use, injection drug use.

Abbreviations: eGFR, estimated glomerular filtration rate; FPL, federal poverty level; GED, general education diploma; HR, hazard ratio; SDOH, social determinants of health; U.S., United States.
